# Supplementary material for: Mineral Paragenesis Precipitating in Salt Flat Pools of Continental Environments Replicated in Microbial Mat Microcosms without Evaporation
Source: MDPI journal article supplement (doi:10.3390/min12050646), 2022-05-20
Supplement: s1 [file s1]

Supplementary Table S1: Summary of the microbial mats observations and minerals precipitated within the experiments

| Sample  | Year | Salar | Coord.<br>(Longitude) | Coord.<br>(Latitude) | Subst. | Water | Check-ups |                              |                                         |                                                   |                     |                       |
|---------|------|-------|-----------------------|----------------------|--------|-------|-----------|------------------------------|-----------------------------------------|---------------------------------------------------|---------------------|-----------------------|
|         |      |       |                       |                      |        |       | Day 0     | Day 7                        | Day 30                                  | Day 60                                            | Day 90              | Day 300               |
| GOR-1   | 2018 | GOR   | -68.690186            | -25.42855            | CG     | Gor 1 | NP        | Grey UCM:<br>PSB             | Grey UCM:<br>NC                         | Grey UCM:<br>pGp, EPS-rich                        | Grey UCM:<br>NC     | Grey UCM:<br>NC       |
| CGOR-1* | 2018 | GOR   | -68.690186            | -25.42855            | NS     | Gor 1 | NP        | NP                           | NP                                      | NP                                                | pGp (Fig. 11)       | NC                    |
| GOR-2   | 2018 | GOR   | -68.64022             | -25.359822           | CG     | Gor 2 | NP        | White<br>UCM: Dia,<br>Cya    | White<br>UCM: Dia,<br>hbGp (Fig.<br>9A) | White UCM:<br>hbGp, Dia,<br>Baccilli (Fig.<br>6L) | Grey UCM:<br>NC     | Black UCM:<br>NC      |
| CGOR-2  | 2018 | GOR   | -68.64022             | -25.359822           | NS     | Gor 2 | NP        | NP                           | NP                                      | NP                                                | NP                  | NP                    |
| PAJ-1   | 2018 | PAJ   | -68.81904             | -25.16855            | CG     | Paj 1 | NP        | White<br>UCM: Dia,<br>PSB    | White<br>UCM: IGp,<br>pGp, Dia          | Grey UCM: NC                                      | Grey UCM:<br>NC     | Grey Brown<br>UCM: NC |
| PAJ-2.1 | 2018 | PAJ   | -68.832301            | -25.192691           | FG     | Paj 1 | NP        | Dark Grey<br>NMD: NP         | Dark Grey<br>NMD: NC                    | Green Grey<br>UCM: pGp, bSi,<br>Dia (Fig. 10C)    | Grey UCM:<br>NC     | Dark Grey<br>UCM: NC  |
| PAJ-2.2 | 2018 | PAJ   | -68.832301            | -25.192691           | NS     | Paj 1 | NP        | Dark Grey<br>NMD: Dia        | Dark Grey<br>NMD: Dia                   | Dark Grey<br>NMD:NC                               | Dark Grey<br>NMD:NC | Dark Grey<br>NMD:NC   |
| CPAJ-1  | 2018 | PAJ   | -68.81904             | -25.16855            | NS     | Paj 1 | NP        | NP                           | NP                                      | NP                                                | NP                  | NP                    |
| PAJ-3   | 2018 | PAJ   | -68.84722             | -25.1588             | CG     | Paj 3 | NP        | White<br>UCM:<br>Dccpss, Dia | White<br>UCM:<br>Dccpss, Dia,<br>IGp    | Yellow UCM:<br>NC                                 | Yellow UCM:<br>NC   | Orange<br>UCM: NC     |
| PAJ-4.1 | 2018 | PAJ   | -68.84924             | -25.155087           | NS     | Paj 3 | NP        | White<br>NMD: NP             | White<br>NMD: NC                        | White NMD:<br>NC                                  | White NMD:<br>NC    | Orange<br>NMD: NC     |
| PAJ-4.2 | 2018 | PAJ   | -68.84924             | -25.155087           | CG     | Paj 3 | NP        | White<br>UCM: NP             | White<br>UCM: NC                        | White UCM:<br>NC                                  | White UCM:<br>NC    | Yellow<br>UCM: NC     |

\*Evaporated control.

(Fig. X) refers to the corresponding figure. Abbreviations: GOR/PAJ=Microbial mat incubation from Salar de Gorbea and Salar de Pajonales, respectively. CGOR/CPAJ=Just-water control from Salar de Gorbea and Salar de Pajonales, respectively. Coord. = Coordinates. Subst.= Substrate. FG = Fine Gypsum. CG = Coarse Gypsum. NS = No Substrate. UCM = Unconsolidated Microbial Mat. CM = Consolidated Microbial Mat. SGM = Slimy Gelatinous Microbial Mat (appearance of CM mat but filled with bubbles: Fig. 6I). NMD = No Microbial Mat Developed. NP = No Precipitates. NC = No Changes Observed. PSB = Purple Sulfur Bacteria. FSB = Filamentous Sulfur Bacteria. Dia = Diatom. Cya = Cyanobacteria. Dccpss = Dactylococcopsis. Chccpss = Chroococcidiopsis. Fil = Filaments. EPS = Extracellular Polymeric Substances. pGp = Prismatic Gypsum. IGp = Lenticular Gypsum. hbGp = Hemibipyramidal Gypsum. eHl = Euhedral Halite. nHl = Nodular Halite. sCc = Subhedral Calcite. pCc = Prismatic Calcite. bCc = Botryoidal calcite. bSi = Botryoidal Silicate. pClays = Protoclays.

| Sample  | Year | Salar | Coord.<br>(Longitude) | Coord.<br>(Latitude) | Subst. | Water  | Check-ups |                                   |                        |                                                            |                             |                                         |
|---------|------|-------|-----------------------|----------------------|--------|--------|-----------|-----------------------------------|------------------------|------------------------------------------------------------|-----------------------------|-----------------------------------------|
|         |      |       |                       |                      |        |        | Day 0     | Day 7                             | Day 30                 | Day 60                                                     | Day 90                      | Day 300                                 |
| PAJ-5.1 | 2018 | PAJ   | -68.81904             | -25.16855            | FG     | Paj 3  | NP        | White<br>UCM: NP                  | White UCM:<br>NC       | White UCM:<br>NC                                           | White UCM:<br>NC            | White<br>UCM: NC                        |
| PAJ-5.2 | 2018 | PAJ   | -68.81904             | -25.16855            | NS     | Paj 3  | NP        | NMD: NP                           | NMD: NC                | NMD: NC                                                    | NMD: NC                     | NMD: NC                                 |
| CPAJ-4  | 2018 | PAJ   | -68.8354              | -25.14506            | NS     | Paj 3  | NP        | NP                                | NP                     | NP                                                         | NP                          | NP                                      |
| PAJ-6.1 | 2018 | PAJ   | -68.8354              | -25.14506            | FG     | Paj 6  | NP        | White<br>UCM: NP                  | White UCM:<br>NC       | Grey UCM: NC                                               | Grey UCM:<br>NC             | Grey UCM:<br>NC                         |
| PAJ-6.2 | 2018 | PAJ   | -68.8354              | -25.14506            | NS     | Paj 6  | NP        | White<br>UCM: NP                  | White UCM:<br>NC       | White UCM:<br>NC                                           | White UCM:<br>NC            | Orange<br>UCM: NC                       |
| CPAJ-6  | 2018 | PAJ   | -68.82651             | -25.14593            | NS     | Paj 6  | NP        | NP                                | NP                     | NP                                                         | NP                          | NP                                      |
| PAJ-7.1 | 2018 | PAJ   | -68.85393             | -25.15765            | FG     | Paj 7  | NP        | White<br>UCM: NP                  | White UCM:<br>pGp      | White UCM:<br>NC                                           | Green,<br>Yellow UCM:<br>NC | Green,<br>Yellow<br>UCM: NC             |
| PAJ-7.2 | 2018 | PAJ   | -68.85393             | -25.15765            | NS     | Paj 7  | NP        | Grey UCM:<br>NP                   | Grey UCM:<br>Fil, PSB  | Grey UCM: NC                                               | Grey UCM:<br>NC             | Orange<br>UCM: NC                       |
| PAJ-7.3 | 2018 | PAJ   | -68.85393             | -25.15765            | CG     | Paj 7  | NP        | Grey UCM:<br>NP                   | Grey UCM:<br>IGp       | Grey UCM: NC                                               | Yellow,<br>Brown UCM:<br>NC | Yellow,<br>Brown<br>UCM: NC             |
| CPAJ-7  | 2018 | PAJ   | -68.85393             | -25.15765            | NS     | Paj 7  | NP        | NP                                | NP                     | NP                                                         | NP                          | NP                                      |
| PAJ-10  | 2019 | PAJ   | -68.83371             | -25.19301            | NS     | Paj 10 | NP        | Light<br>Green<br>UCM: Fig.<br>6A | Light Green<br>UCM: NC | Light Green:<br>pGp, IGp, sCc<br>(Fig, 10A), Dia           | Green,<br>Orange<br>UCM: NC | Orange CM:<br>NC                        |
| PAJ-11  | 2019 | PAJ   | -68.83071             | -25.19198            | NS     | Paj 11 | NP        | Dark<br>Green<br>UCM: NP          | Dark Green<br>UCM: NC  | Dark Green<br>UCM: pGp (Fig.<br>9B), IGp (Fig.<br>9E), Dia | Green,<br>Orange<br>UCM: NC | Orange,<br>Green CM:<br>NC (Fig.<br>6M) |

(Supplementary Table Continuation)

(Fig. X) refers to the corresponding figure. Abbreviations: GOR/PAJ=Microbial mat incubation from Salar de Gorbea and Salar de Pajonales, respectively. CGOR/CPAJ=Just water control from Salar de Gorbea and Salar de Pajonales, respectively. Coord. = Coordinates. Subst.= Substrate. FG = Fine Gypsum. CG = Coarse Gypsum. NS = No Substrate. UCM = Unconsolidated Microbial Mat. CM = Consolidated Microbial Mat. SGM = Slimy Gelatinous Microbial Mat (appearance of CM mat but filled with bubbles:Fig. 6I). NMD = No Microbial Mat Developed. NP = No Precipitates. NC = No Changes Observed. PSB = Purple Sulfur Bacteria. FSB = Filamentous Sulfur Bacteria. Dia = Diatom. Cyan = Cyanobacteria. Dccpss = Dactylococcopsis. Chccpss = Chroococcidiopsis. Fil = Filaments. EPS = Extracellular Polymeric Substances. pGp = Prismatic Gypsum. IGp = Lenticular Gypsum. hbGp = Hemibipyramidal Gypsum. eHl = Euhedral Halite. nHl = Nodular Halite. sCc = Subhedral Calcite. pCc = Prismatic Calcite. bCc = Botryoidal calcite. bSi = Botryoidal Silicate. pClays = Protoclays.

| Sample | Year | Salar | Coord.<br>(Longitude) | Coord.<br>(Latitude) | Subst. | Water  | Check-ups |                                        |                                         |                                                                                                                            |                                                                                       |                            |
|--------|------|-------|-----------------------|----------------------|--------|--------|-----------|----------------------------------------|-----------------------------------------|----------------------------------------------------------------------------------------------------------------------------|---------------------------------------------------------------------------------------|----------------------------|
|        |      |       |                       |                      |        |        | Day 0     | Day 7                                  | Day 30                                  | Day 60                                                                                                                     | Day 90                                                                                | Day 300                    |
| PAJ-12 | 2019 | PAJ   | -68.84586             | -25.15591            | NS     | Paj 12 | NP        | Dark Purple<br>UCM: NP                 | Light Grey UCM:<br>Chccpss<br>(Fig. 6H) | Light Grey UCM:<br>IGp (Fig. 9D), pGp,<br>eHI, Chccpss,<br>Cyan fil, Dia (Fig.<br>6F-G)                                    | Dark Grey UCM: IGp,<br>pGp, bSi,<br>EPS-rich,<br>Dia (Fig.<br>6P),<br>Chccpss,<br>PSB | Dark Grey CM: NC           |
| PAJ-13 | 2019 | PAJ   | -68.847395            | -25.154823           | CG     | Paj 13 | NP        | White<br>UCM: NP                       | White<br>UCM: NC                        | White Yellow<br>UCM: NC                                                                                                    | Yellow<br>UCM: NC                                                                     | Yellow<br>UCM: NC          |
| PAJ-14 | 2019 | PAJ   | -68.819037            | -25.168545           | NS     | Paj 14 | NP        | Black UCM:<br>Cyan fil<br>(Fig. 6D)    | Green<br>UCM: NC                        | Green, Brown<br>UCM: pGp, Cyan<br>fil, Dia, EPS-rich                                                                       | Brown,<br>Orange<br>UCM: NC                                                           | Brown,<br>Orange CM:<br>NC |
| PAJ-15 | 2019 | PAJ   | -68.83371             | -25.19301            | NS     | Paj 15 | NP        | Dark Grey<br>UCM: NP                   | Green,<br>Yellow<br>UCM:<br>Cyan        | Green, Yellow<br>UCM: bSi, bCc<br>(Fig. 10B), pClays<br>(Fig. 10D), Dia,<br>EPS-rich, PSB,<br>Cyan Fil                     | Green CM:<br>NC                                                                       | Black,<br>Brown CM:<br>NC  |
| PAJ-16 | 2019 | PAJ   | -68.83716             | -25.14552            | FG     | Paj 16 | NP        | White<br>UCM: Dia<br>(Fig. 6B)         | Light<br>Yellow<br>UCM: Fig.<br>6E      | Grey Orange<br>UCM: NC                                                                                                     | Grey<br>Orange<br>UCM: NC                                                             | Grey<br>Orange<br>SGM: NC  |
| PAJ-17 | 2019 | PAJ   | -68.82789             | -25.14455            | NS     | Paj 17 | NP        | Orange<br>SGM:<br>Dccpss<br>(Fig., 6C) | Orange<br>SGM:<br>Dccpss                | Orange SGM: Dia,<br>Dccpss, PSB, Cyan<br>Fil (Fig. 6I,J,K),<br>EPS-rich, pGp (Fig.<br>9C), eHI (Fig. 9H),<br>nHI (Fig. 9G) | Orange<br>SGM: NC                                                                     | Orange CM:<br>NC           |

(Supplementary Table Continuation)

(Fig. X) refers to the corresponding figure. Abbreviations: GOR/PAJ=Microbial mat incubation from Salar de Gorbea and Salar de Pajonales, respectively. CGOR/CPAJ=Just water control from Salar de Gorbea and Salar de Pajonales, respectively. Coord. = Coordinates. Subst.= Substrate. FG = Fine Gypsum. CG = Coarse Gypsum. NS = No Substrate. UCM = Unconsolidated Microbial Mat. CM = Consolidated Microbial Mat. SGM = Slimy Gelatinous Microbial Mat (appearance of CM mat but filled with bubbles:Fig. 6I). NMD = No Microbial Mat Developed. NP = No Precipitates. NC = No Changes Observed. PSB = Purple Sulfur Bacteria. FSB = Filamentous Sulfur Bacteria. Dia = Diatom. Cyan = Cyanobacteria. Dccpss = Dactylococcopsis. Chccpss = Chroococcidiopsis. Fil = Filaments. EPS = Extracellular Polymeric Substances. pGp = Prismatic Gypsum. IGp = Lenticular Gypsum. hbGp = Hemibipyramidal Gypsum. eHI = Euhedral Halite. nHI = Nodular Halite. sCc = Subhedral Calcite. pCc = Prismatic Calcite. bCc = Botryoidal calcite. bSi = Botryoidal Silicate. pClays = Protoclays.

| Sample   | Year | Salar | Coord.<br>(Longitude) | Coord.<br>(Latitude) | Subst. | Water  | Check-ups |                            |                                |                                                                                                 |                            |                            |
|----------|------|-------|-----------------------|----------------------|--------|--------|-----------|----------------------------|--------------------------------|-------------------------------------------------------------------------------------------------|----------------------------|----------------------------|
|          |      |       |                       |                      |        |        | Day 0     | Day 7                      | Day 30                         | Day 60                                                                                          | Day 90                     | Day 300                    |
| GOR-10   | 2020 | GOR   | -68.658558            | -25.398318           | NS     | Gor 10 | NP        | White<br>UCM: NP           | White<br>UCM: NP               | Yellow UCM:<br>PSB, Dia, Cyan,<br>pGp                                                           | Yellow UCM:<br>NC          | White<br>UCM: NC           |
| GOR-11   | 2020 | GOR   | -68.640682            | -25.358234           | NS     | Gor 11 | NP        | Grey UCM:<br>NP            | Grey UCM:<br>Cyan, Dia,<br>pGp | Green Grey<br>UCM: NC                                                                           | Grey UCM:<br>NC            | Green Grey<br>UCM: NC      |
| GOR-12   | 2020 | GOR   | -68.642527            | -25.362691           | NS     | Gor 12 | NP        | Green,<br>Brown<br>UCM: NP | Green,<br>Brown<br>UCM: NP     | Green, Brown<br>UCM: NC                                                                         | Green,<br>Brown UCM:<br>NC | Green,<br>Black UCM:<br>NC |
| GOR-13   | 2020 | GOR   | -68.641464            | -25.355969           | NS     | Gor 13 | NP        | Brown<br>UCM: NP           | Brown<br>UCM: NP               | Brown UCM:<br>NC                                                                                | Brown UCM:<br>NC           | Green,<br>Brown<br>UCM: NC |
| GOR-14   | 2020 | GOR   | -68.641611            | -25.356701           | NS     | Gor 14 | NP        | Grey UCM:<br>NP            | Grey UCM:<br>NP                | Grey UCM: NC                                                                                    | Yellow<br>Brown UCM:<br>NC | Yellow<br>Green: NC        |
| GOR-15   | 2020 | GOR   | -68.690186            | -25.42855            | NS     | Gor 15 | NP        | White<br>UCM: NP           | White<br>UCM: NP               | White UCM:<br>NP                                                                                | White UCM:<br>NC           | White<br>UCM: NC           |
| GOR-16   | 2020 | GOR   | -68.658308            | -25.398949           | NS     | Gor 16 | NP        | Grey UCM:<br>NP            | Grey UCM:<br>NP                | Grey UCM: Dia<br>(Fig 6N, O),<br>PSB, pGp (Fig,<br>9F), pCc, bSi,<br>eHI (Fig. 9I),<br>EPS-rich | Green,<br>Brown UCM:<br>NC | Green,<br>Brown<br>UCM: NC |
| GOR-17   | 2020 | GOR   | -68.65892             | -25.399567           | CG     | Gor 17 | NP        | Grey UCM:<br>NP            | Grey UCM:<br>Dia, Cyan,<br>pGp | Grey UCM: NC                                                                                    | Brown UCM:<br>NC           | Light Green<br>CM: NC      |
| GOR-18.1 | 2020 | GOR   | -68.661015            | -25.394413           | CG     | Gor 18 | NP        | Grey UCM:<br>NP            | Grey UCM:<br>NP                | Grey UCM: NC                                                                                    | Dark Green<br>UCM: NC      | Dark Green<br>UCM: NC      |

(Supplementary Table Continuation)

(Fig. X) refers to the corresponding figure. Abbreviations: GOR/PAJ=Microbial mat incubation from Salar de Gorbea and Salar de Pajonales, respectively. CGOR/CPAJ=Just water control from Salar de Gorbea and Salar de Pajonales, respectively. Coord. = Coordinates. Subst.= Substrate. FG = Fine Gypsum. CG = Coarse Gypsum. NS = No Substrate. UCM = Unconsolidated Microbial Mat. CM = Consolidated Microbial Mat. SGM = Slimy Gelatinous Microbial Mat (appearance of CM mat but filled with bubbles:Fig. 6I). NMD = No Microbial Mat Developed. NP = No Precipitates. NC = No Changes Observed. PSB = Purple Sulfur Bacteria. FSB = Filamentous Sulfur Bacteria. Dia = Diatom. Cyan = Cyanobacteria. Dccpss = Dactylococcopsis. Chccpss = Chroococcidiopsis. Fil = Filaments. EPS = Extracellular Polymeric Substances. pGp = Prismatic Gypsum. IgP = Lenticular Gypsum. hbGp = Hemibipyramidal Gypsum. eHI = Euhedral Halite. nHI = Nodular Halite. sCc = Subhedral Calcite. pCc = Prismatic Calcite. bCc = Botryoidal calcite. bSi = Botryoidal Silicate. pClays = Protoclays.

| Sample   | Year | Salar | Coord.<br>(Longitude) | Coord.<br>(Latitude) | Subst. | Water  | Check-ups          |                       |                                     |                       |                       |                       |
|----------|------|-------|-----------------------|----------------------|--------|--------|--------------------|-----------------------|-------------------------------------|-----------------------|-----------------------|-----------------------|
|          |      |       |                       |                      |        |        | Day 0              | Day 7                 | Day 30                              | Day 60                | Day 90                | Day 300               |
| GOR-18.2 | 2020 | GOR   | -68.661015            | -25.394413           | NS     | Gor 18 | NP                 | Brown Grey<br>UCM: NP | Brown Grey<br>UCM: Dia,<br>PSB, FSB | Brown Grey<br>UCM: NC | Green, Red<br>UCM: NC | Dark Green<br>UCM: NC |
| GOR-19   | 2020 | GOR   | -68.658923            | -25.399574           | NS     | Gor 19 | NP                 | Grey UCM:<br>NP       | Grey UCM:<br>NC                     | Grey UCM: NC          | Green UCM:<br>NC      | Green<br>UCM: NC      |
| CGOR-10  | 2020 | GOR   | -68.658558            | -25.398318           | NS     | Gor 10 | NP                 | NP                    | NP                                  | NP                    | NP                    | NP                    |
| CGOR-11  | 2020 | GOR   | -68.640682            | -25.358234           | NS     | Gor 11 | NP                 | NP                    | NP                                  | NP                    | NP                    | NP                    |
| CGOR-12  | 2020 | GOR   | -68.642527            | -25.362691           | NS     | Gor 12 | NP                 | NP                    | NP                                  | NP                    | NP                    | NP                    |
| CGOR-13  | 2020 | GOR   | -68.641464            | -25.355969           | NS     | Gor 13 | NP                 | NP                    | NP                                  | NP                    | NP                    | NP                    |
| CGOR-14  | 2020 | GOR   | -68.641611            | -25.356701           | NS     | Gor 14 | NP                 | NP                    | NP                                  | NP                    | NP                    | NP                    |
| CGOR-15  | 2020 | GOR   | -68.690186            | -25.42855            | NS     | Gor 15 | NP                 | NP                    | NP                                  | NP                    | NP                    | NP                    |
| CGOR-16  | 2020 | GOR   | -68.658308            | -25.398949           | NS     | Gor 16 | NP                 | NP                    | NP                                  | NP                    | NP                    | NP                    |
| CGOR-17  | 2020 | GOR   | -68.65892             | -25.399567           | NS     | Gor 17 | NP                 | NP                    | NP                                  | NP                    | NP                    | NP                    |
| CGOR-18  | 2020 | GOR   | -68.661015            | -25.394413           | NS     | Gor 19 | NP                 | NP                    | NP                                  | NP                    | NP                    | NP                    |
| CGOR-19  | 2020 | GOR   | -68.658923            | -25.399574           | NS     | Gor 19 | NP                 | NP                    | NP                                  | NP                    | NP                    | NP                    |
| CG       | 2018 | PAJ   | -68.786408            | -25.145443           | CG     | No     | Gp<br>(Fig.<br>8A) |                       |                                     |                       |                       |                       |
| FG       | 2018 | PAJ   | -68.786408            | -25.145443           | FG     | No     | Gp<br>(Fig.<br>8B) |                       |                                     |                       |                       |                       |

(Supplementary Table Continuation)

(Fig. X) refers to the corresponding figure. Abbreviations: GOR/PAJ=Microbial mat incubation from Salar de Gorbea and Salar de Pajonales, respectively. CGOR/CPAJ=Just water control from Salar de Gorbea and Salar de Pajonales, respectively. Coord. = Coordinates. Subst.= Substrate. FG = Fine Gypsum. CG = Coarse Gypsum. NS = No Substrate. UCM = Unconsolidated Microbial Mat. CM = Consolidated Microbial Mat. SGM = Slimy Gelatinous Microbial Mat (appearance of CM mat but filled with bubbles:Fig. 6I). NMD = No Microbial Mat Developed. NP = No Precipitates. NC = No Changes Observed. PSB = Purple Sulfur Bacteria. FSB = Filamentous Sulfur Bacteria. Dia = Diatom. Cyan = Cyanobacteria. Dccpss = Dactylococcopsis. Chccpss = Chroococcidiopsis. Fil = Filaments. EPS = Extracellular Polymeric Substances. pGp = Prismatic Gypsum. lGp = Lenticular Gypsum. hbGp = Hemibipyramidal Gypsum. eHl = Euhedral Halite. nHl = Nodular Halite. sCc = Subhedral Calcite. pCc = Prismatic Calcite. bCc = Botryoidal calcite. bSi = Botryoidal Silicate. pClays = Protoclays.
